# Supplementary material for: Ionothermal synthesis of cobalt iron layered double hydroxides (LDHs) with expanded interlayer spacing as advanced electrochemical materials
Source: Royal Society of Chemistry journal article supplement (doi:10.1039/c4ta03789h), 2014-08-22
Supplement: c4ta03789h1.pdf [file c4ta03789h1.pdf]

## Supporting Information

# **Ionothermal synthesis of cobalt iron layered double hydroxide (LDH) with expanded interlayer spacing: formation mechanism and enhanced electrochemical performance**

X. Ge, C. D. Gu<sup>1</sup>, X.L. Wang, J.P. Tu

State Key Laboratory of Silicon Materials, Key Laboratory of Advanced Materials and Applications for Batteries of Zhejiang Province and Department of Materials Science and Engineering, Zhejiang University, Hangzhou 310027, China.

---

<sup>1</sup> \*Corresponding Author

Tel./fax.: +86 571 87952573

E-mail addresses: cdgu@zju.edu.cn; changdong\_gu@hotmail.com (C. D. Gu)

To confirm the tetrahedral coordination model for 5-95 CoFe LDH, we prepared two  $\alpha$ -Co(OH)<sub>2</sub> samples with different lattice space in (003) as reference group. As seen from the XRD pattern (**Figure S1a**), the feature of the 180-WU Co LDH sample is that it contains only  $\alpha$ -Co(OH)<sub>2</sub> with 7.4 Å in its (003) plane. 210-WU-Co LDH contains both  $\alpha$ -Co(OH)<sub>2</sub> with 7.4 Å and 11.3 Å in its (003) plane, with a  $I_{7.4} / I_{11.3}$  value of 1.99 (**Figure S1a**).

Comparing the UV-Vis spectra of the samples in **Figure S1b**, it's clear that the occurrence of  $\nu_3(\text{Td})$  at 580 and 630 nm is related to the existence of 11.3 Å (003) planes (See XRD patterns in **Figure S1a**). A simplified Structural model for 7.4 Å layered double hydroxide is provided in **Figure S1c**. The cobalt atoms are octahedrally coordinated.

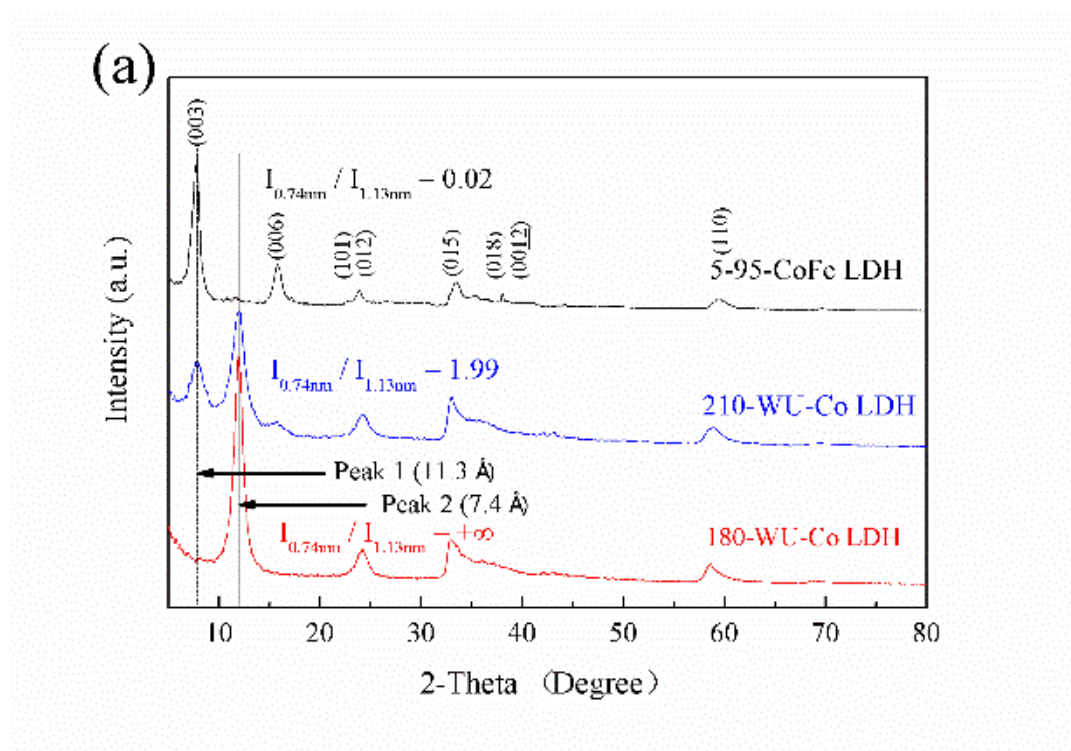

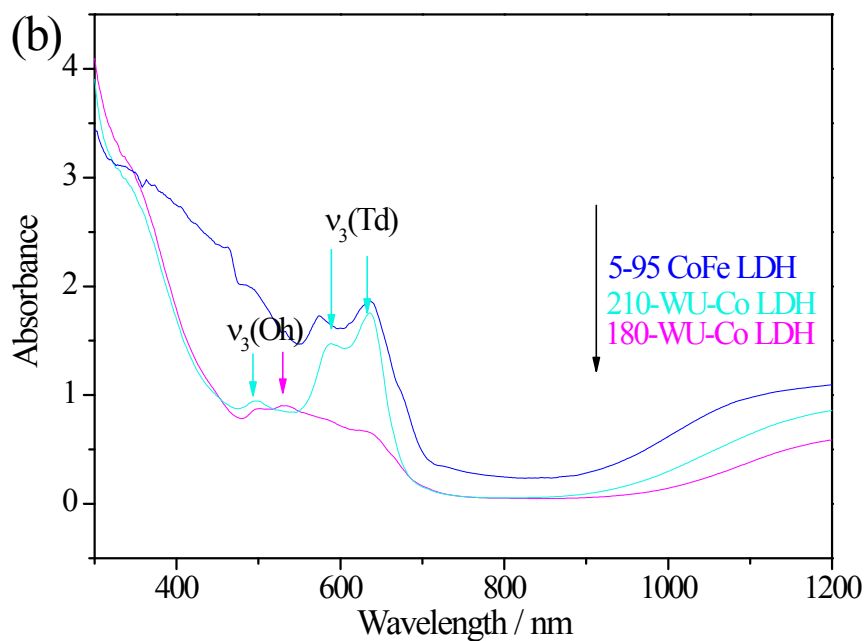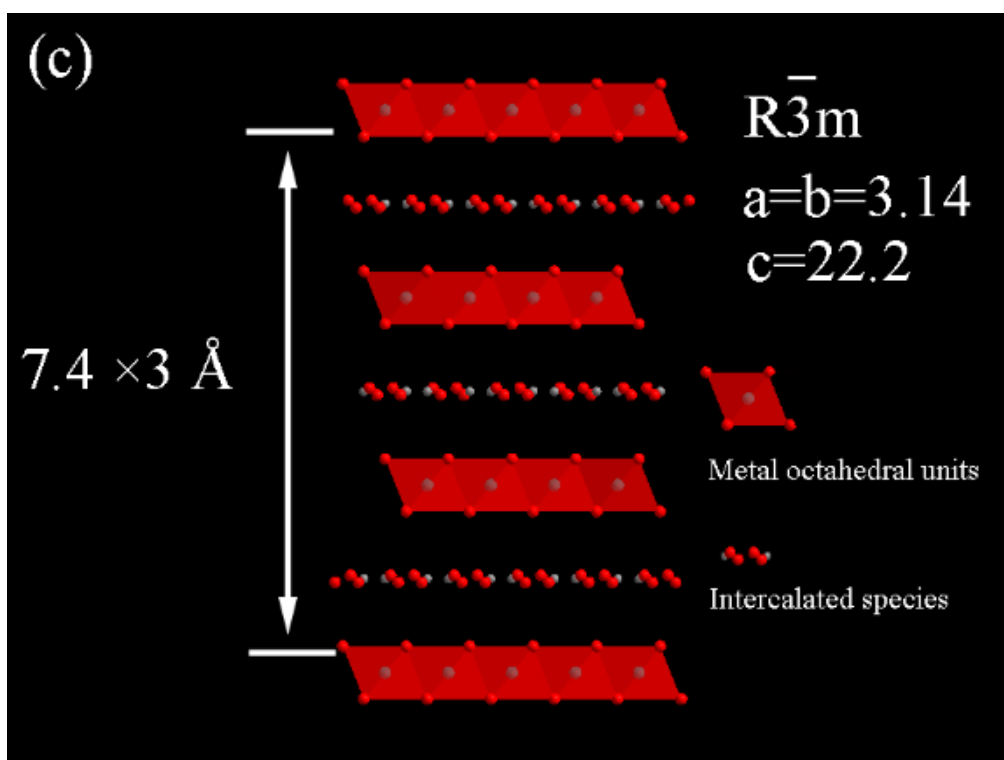

Figure S1 (a) XRD patterns and (b) UV-Vis spectra of 180-WU Co LDH, 210-WU Co LDH and 5-95 CoFe LDH. (c) Structural model of

**$\alpha$ -Co(OH)<sub>2</sub> with 7.4Å in (003) plane.**

Elemental stoichiometry of 5-95-CoFe LDH and the two reference samples are analysed by ICP-AES, IC and CNH elemental analyser. Given amount of samples (See **Table S1**) are used to obtain a H<sub>2</sub>SO<sub>4</sub> solution. For IC and ICP-AES experiments, the above solution are diluted to 1/10 and 1/100, respectively. The original data are provide in **Table S1-S5**. The chemical formula for 180-WU Co LDH, 210-WU Co LDH and 5-95 CoFe LDH are determined to be **CoC<sub>1.008</sub>O<sub>5.549</sub>N<sub>0.733</sub>H<sub>2.643</sub>Cl<sub>0.032</sub>**, **CoC<sub>1.332</sub>O<sub>4.923</sub>N<sub>1.194</sub>H<sub>3.243</sub>Cl<sub>0.024</sub>**, and **Co<sub>0.901</sub>Fe<sub>0.099</sub>C<sub>1.398</sub>O<sub>6.857</sub>N<sub>0.925</sub>H<sub>3.375</sub>Cl<sub>0.018</sub>**, respectively.

FTIR peaks are indexed in **Figure S2a** based on rational analysis. The most obvious feature is that LDH with larger interlayer spacing is correlated with weaker peaks in Region 1 (2500-2000 cm<sup>-1</sup>) and stronger peaks in Region 2 (1900-1300 cm<sup>-1</sup>). This trend is not influenced by iron element in 5-95 CoFe LDH because 210-WU-Co LDH also follow this rule. For 180-WU-Co LDH and 5-95 CoFe LDH, we provide in **Figure S2b and S2c** with their magnified spectra in Region 1 and Region 2, respectively. For 5-95 CoFe LDH, more functional groups including -NH<sub>2</sub>, R-C(=O)-H, C-N, and -(C=O)-N are detected and less -N=C=O, -C≡N, -N=C=N- are detected in FTIR.

During heating, the decomposition of urea and choline chloride is a very complex process and it's strongly related to the experimental condition. The decomposition products reported in the literatures are collected in **Figure S2d**.<sup>1-5</sup> Combining all the above information, the formation of **LDH with larger interlayer space is accompanied with the following structural changes:**

**1:** tetrahedrally coordinated cobalt occurs.

**2:** more functional groups including  $\text{-NH}_2$ ,  $\text{R-C(=O)-H}$ ,  $\text{C-N}$ , and  $\text{-(C=O)-N}$  are detected and less  $\text{-N=C=O}$ ,  $\text{-C}\equiv\text{N}$ ,  $\text{-N=C=N-}$  are detected in FTIR. Considering the possible thermo decomposition process of urea and choline chloride component in CU (Figure S2d), acetaldehyde, ethenol and biuret intercalated (drawn in blue) and less cyanate or isocyanate (drawn in red) species are intercalated into LDH with larger interlayer spacing. This also causes an increase in C, N, H content for 210-WU-Co LDH and 5-95 CoFe LDH. In addition, more  $\text{CO}_3^{2-}$  are also detected.

**3:** less  $\text{Cl-}$  are intercalated.

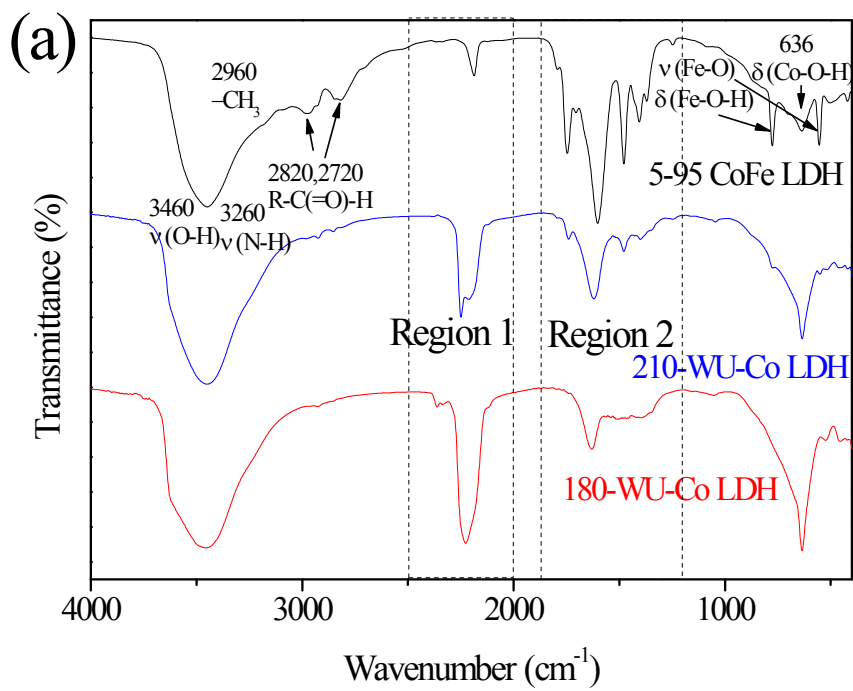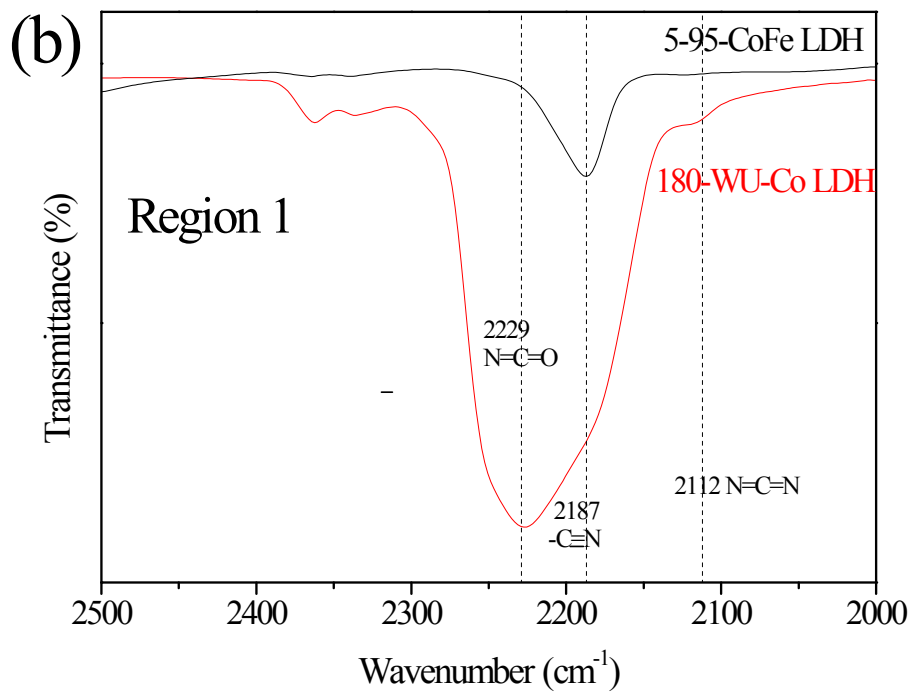

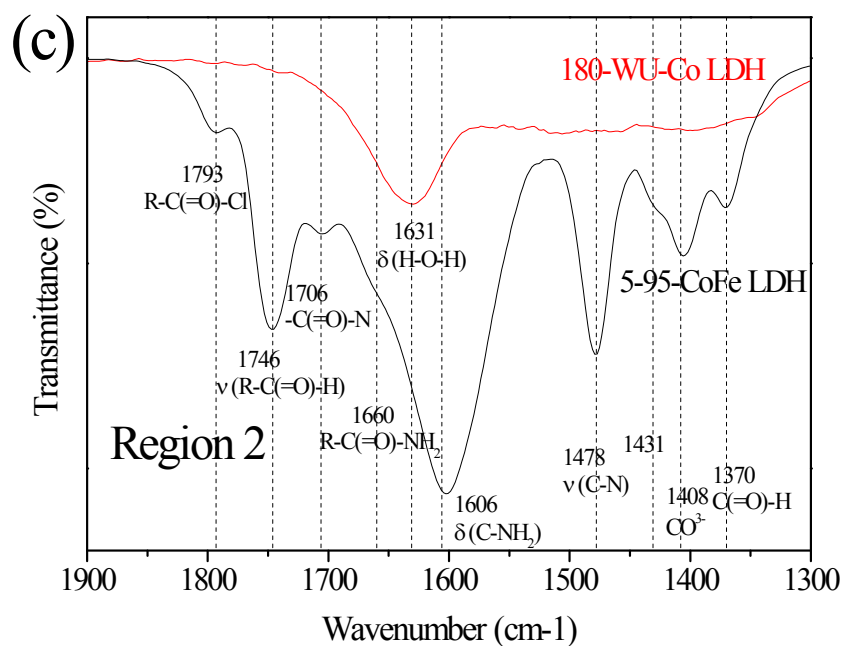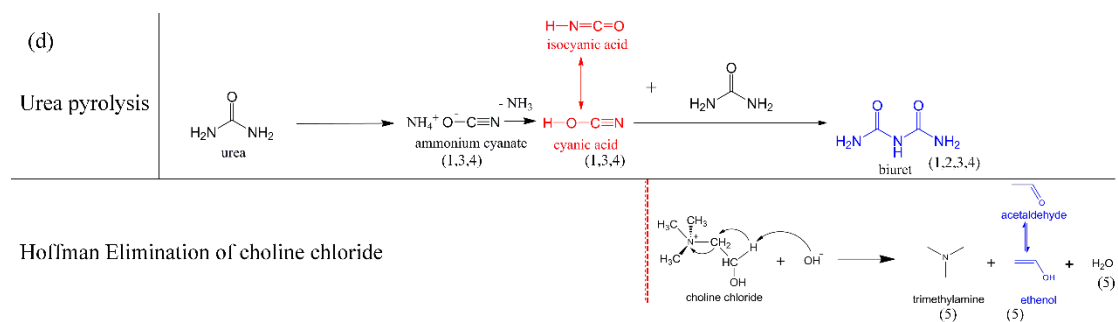

**Figure S2** (a) FTIR full spectra of 180-WU-Co LDH, 210-WU-Co LDH and 5-95 CoFe LDH. (b,c) Magnified FTIR images from 2500-2000  $\text{cm}^{-1}$  and 1900-1300  $\text{cm}^{-1}$ , respectively. (d) Possible pyrolysis route of CU, the numbers in brackets under each decomposition product indicates the related literatures



**Table S1** Mass of samples dissolved for IC and ICP-AES analysis

|               | Mass / mg   | solution                                   |
|---------------|-------------|--------------------------------------------|
| 180-WU-Co LDH | <b>5.14</b> | 2.5 mL 0.4% H <sub>2</sub> SO <sub>4</sub> |
| 210-WU-Co LDH | <b>5.03</b> |                                            |
| 5-95-CoFe LDH | <b>4.92</b> |                                            |

**Table S2** C,N,H elemental analysis results

|               | N %  | C %  | H %  |
|---------------|------|------|------|
| 180-WU-Co LDH | 5.90 | 6.97 | 1.52 |
| 210-WU-Co LDH | 9.59 | 9.17 | 1.86 |
| 5-95-CoFe LDH | 6.41 | 8.30 | 1.67 |

**Table S3** IC analysis, the samples in Table S1 are diluted by 10 times

|               | Cl <sup>-</sup> (mg L <sup>-1</sup> ) | NO <sub>3</sub> <sup>-</sup> (mg L <sup>-1</sup> ) | Original Cl <sup>-</sup> mass ration |
|---------------|---------------------------------------|----------------------------------------------------|--------------------------------------|
| 180-WU-Co LDH | 1.346                                 | /                                                  | <b>0.65 %</b>                        |
| 210-WU-Co LDH | 1.003                                 | /                                                  | <b>0.49 %</b>                        |
| 5-95 CoFe LDH | 0.627                                 | /                                                  | <b>0.32 %</b>                        |

**Table S4** ICP-AES analysis, the samples in Tables S1 are diluted by 100 times.

|               | Co (mg L <sup>-1</sup> ) | Fe (mg L <sup>-1</sup> ) | Mass ratio in the sample (Co) | Mass ratio in the sample (Fe) |
|---------------|--------------------------|--------------------------|-------------------------------|-------------------------------|
| 180-WU-Co LDH | 6.97                     | \                        | <b>33.90 %</b>                | \                             |
| 210-WU-Co LDH | 6.80                     | \                        | <b>33.80 %</b>                | \                             |
| 5-95-CoFe LDH | 5.17                     | 0.54                     | <b>26.27 %</b>                | <b>2.74%</b>                  |

**Table S5** elemental stoichiometry

|               | Atomic weight ratio                                                                                                                            | Atomic molar ratio                                                                                                                      |
|---------------|------------------------------------------------------------------------------------------------------------------------------------------------|-----------------------------------------------------------------------------------------------------------------------------------------|
| 180-WU-Co LDH | Co <sub>0.3390</sub> C <sub>0.0696</sub> O <sub>0.5107</sub> N <sub>0.0590</sub> H <sub>0.0152</sub> Cl <sub>0.0065</sub>                      | CoC <sub>1.008</sub> O <sub>5.549</sub> N <sub>0.733</sub> H <sub>2.643</sub> Cl <sub>0.032</sub>                                       |
| 210-WU-Co LDH | Co <sub>0.3380</sub> C <sub>0.0917</sub> O <sub>0.4518</sub> N <sub>0.0959</sub> H <sub>0.0186</sub> Cl <sub>0.0049</sub>                      | CoC <sub>1.332</sub> O <sub>4.923</sub> N <sub>1.194</sub> H <sub>3.243</sub> Cl <sub>0.024</sub>                                       |
| 5-95 CoFe LDH | Co <sub>0.2627</sub> Fe <sub>0.0274</sub> C <sub>0.0830</sub> O <sub>0.5429</sub> N <sub>0.0641</sub> H <sub>0.0167</sub> Cl <sub>0.0032</sub> | Co <sub>0.901</sub> Fe <sub>0.099</sub> C <sub>1.398</sub> O <sub>6.857</sub> N <sub>0.925</sub> H <sub>3.375</sub> Cl <sub>0.018</sub> |

1. A. Querejeta-Fernández, M. Parras, A. Varela, F. del Monte, M. García-Hernández and J. M. González-Calbet, *Chem. Mater.*, 2010, **22**, 6529-6541.
2. S. Podsiadło, *Thermochim. Acta*, 1995, **256**, 375-380.
3. P. M. Schaber, J. Colson, S. Higgins, D. Thielen, B. Anspach and J. Brauer, *Thermochim. Acta*, 2004, **424**, 131-142.
4. L. Stradella and M. Argentero, *Thermochim. Acta*, 1993, **219**, 315-323.
5. K. Haerens, E. Matthijs, K. Binnemans and B. Van der Bruggen, *Green Chemistry*, 2009, **11**, 1357-1365.
